# Supplementary material for: Strong and tunable anti-CRISPR/Cas9 activity of AcrIIA4 in plants
Source: bioRxiv or medRxiv preprint supplement (doi:10.1101/2021.01.08.425920), 2021-01-08
Supplement: Supplementary file [file media-1.pdf]

## Supplementary Information

**Supplementary Table 1.** Targeted genes and gRNA sequences of the editing experiment.

| Target gene                                 | gRNA name | Protospacer sequence | Position |
|---------------------------------------------|-----------|----------------------|----------|
| Niben101Scf04551g02001.1 ( <i>NbXT2</i> )   | gXT2      | GCTCTGATTGCACAATGGAA | +1628    |
| Niben101Scf01950g02001.1 ( <i>SPL1950</i> ) | gSPL      | ATGGACATAACAGGCGTCGA | +562     |
| Niben101Scf00366g0008.1 ( <i>SPL9294</i> )  |           |                      | +553     |

**Supplementary Table 2.** List of plasmids used in this work. Sequence information is available at <http://www.gbcloning.upv.es/> by entering the GB Number.

| GB Number | Name                                                                                                       |
|-----------|------------------------------------------------------------------------------------------------------------|
| GB0107    | pDGB1 $\alpha$ 2:SF                                                                                        |
| GB0108    | pDGB3 $\alpha$ 1:P35S:p19:TNOS                                                                             |
| GB0639    | pDGB2 $\alpha$ 2:P35S:hCas9:TNOS                                                                           |
| GB1116    | pDGB3 $\alpha$ 1_PNOS:Luciferase:TNOS-SF-P35S:Renilla:TNOS-P35S:p19:TNOS                                   |
| GB1119    | pDGB3 $\alpha$ 1_P35S:Luciferase:TNOS-SF-P35S:Renilla:TNOS-P35S:p19:TNOS                                   |
| GB1160    | pDGB1 $\Omega$ 1_SIDFR:Luc:TNos-SF-35S:Renilla:TNos-35S:P19:Tnos                                           |
| GB1770    | pDGB3 $\alpha$ 1_U6-26:gXT2:psgRNA                                                                         |
| GB2049    | pDGB3 $\alpha$ 1_U6-26-4gRNA Pnos-F6x2_35s-dCas9:EDLL-Tnos-U6-26-5gRNA<br>Pnos scf F6x2 - 35s-Ms2:VPR-Tnos |
| GB2513    | pDGB3 $\alpha$ 1_dCas9EDLL-Ms2:VPR SF -gRNA DFR -150 2.1                                                   |
| GB3333    | pUPD2_SV40-AcrIIA4 (B3-B4-B5)                                                                              |
| GB3659    | pUPD2_SV40-AcrIIA4 (B3-B4)                                                                                 |
| GB3660    | pUPD2_AcrIIA4 (B3-B4)                                                                                      |
| GB3661    | pUPD2_AcrIIA4 (B3-B4-B5)                                                                                   |
| GB3663    | pUPD2_mAID (N-tag) B2                                                                                      |
| GB3664    | pUPD2_mAID (C-tag) B5                                                                                      |
| GB3344    | pDGB3 $\alpha$ 1:P35S:SV40-AcrIIA4:TNOS                                                                    |
| GB3666    | pDGB3 $\alpha$ 1_P35S:mAID:SV40-AcrIIA4:TNOS                                                               |
| GB3667    | pDGB3 $\alpha$ 1_P35S:SV40-AcrIIA4:mAID:TNOS                                                               |
| GB3668    | pDGB3 $\alpha$ 1_P35S:mAID:AcrIIA4:TNOS                                                                    |
| GB3669    | pDGB3 $\alpha$ 1:p35S:AcrIIA4:mAID:TNOS                                                                    |
| GB3670    | pDGB3 $\alpha$ 1_P35S:K2:SV40-AcrIIA4:TNOS                                                                 |
| GB3671    | pDGB3 $\alpha$ 1_P35S:K2:AcrIIA4:TNOS                                                                      |
| GB3701    | pDGB3 $\alpha$ 1:U6-26:gSPL1.6:psgRNA                                                                      |

**Supplementary Table 3.** List of primers used in this work.

| Gene identifier | Primer Sequence (5'→ 3')  |
|-----------------|---------------------------|
| NbXT2           | TGCACGGTTGTCCGAGTTTG      |
|                 | TTACTTGTGAATTGCTCTCTGGT   |
| SPL1950         | AAATGTTCAATCCCTGGACGAC    |
|                 | CAAAACGGACAGCGACATGGT     |
| SPL9294         | GCCCAGGTTTGAATGCATTAGGG   |
|                 | GAAAACGGACAACGACATGGT     |
| NbDFR           | TTCATCTGCGCATCCCATCA      |
|                 | TCCCTACTGAGTTTAAAGGTATCGA |
| NbAN2           | GGAAAAGTTGCAGACTGAGGTG    |
|                 | ACCCGCAATAAGTGACCATCTG    |
| NbF-box         | TTGGAAACTCTCTCCCCACTTG    |
|                 | GCTCATTGTTGGATGGGTACCT    |

The tables provided below show the *Agrobacterium* cultures co-infiltrated in the same mix for each experiment.

| <b>Construct</b>                  | <b>Plant 1</b> | <b>Plant 2</b> | <b>Plant 3</b> | <b>Plant 4</b> |
|-----------------------------------|----------------|----------------|----------------|----------------|
| 35S:SV40-AcrIIA4:TNos<br>(GB3344) | +              | -              | +              | -              |
| 35s:hCas9:tNos (GB0639)           | +              | +              | +              | +              |
| U6-26:gXT2:psgRNA<br>(GB1770)     | +              | +              | -              | -              |
| U6-26:gSPL1.6:psgRNA<br>(GB3701)  | -              | -              | +              | +              |
| pSF (GB0107)                      | -              | +              | -              | +              |
| 35s:P19:TNos (GB0108)             | +              | +              | +              | +              |

| <b>Construct</b>                                                                                | <b>Plant 1</b> | <b>Plant 2</b> | <b>Plant 3</b> | <b>Plant 4</b> | <b>Plant 5</b> |
|-------------------------------------------------------------------------------------------------|----------------|----------------|----------------|----------------|----------------|
| 35S:SV40-AcrIIA4:Tnos (GB3344)                                                                  | +              | -              | -              | -              | -              |
| SIDFR:Luc:Tnos-SF-35S:Renilla:Tnos-35S:P19:Tnos (GB1160)                                        | +              | +              | +              | -              | -              |
| dCas9EDLL-Ms2:VPR SF -gRNA DFR -150 2.1 (GB2513)                                                | +              | +              | -              | -              | -              |
| U6-26-4gRNA Pnos-F6x2_35s-dCas9:EDLL-Tnos-U6-26-5gRNA Pnos scf F6x2 - 35s-Ms2:VPR-Tnos (GB2049) | -              | -              | +              | -              | -              |
| pSF (GB0107)                                                                                    | -              | +              | +              | -              | -              |
| PNos:Luciferase:Tnos-SF-35S:Renilla:Tnos-35S:P19:Tnos-SF (GB1116)                               | -              | -              | -              | +              | -              |

[illegible]

*Time-course assay (Figure 2B)*

| <b>Construct</b>                                                                                | <b>Plant 1<br/>(day 1)</b> | <b>Plant 2<br/>(day 2)</b> | <b>Plant 3<br/>(day 3)</b> | <b>Plant 4<br/>(day 4)</b> | <b>Plant 5</b> | <b>Plant 6</b> | <b>Plant 7</b> | <b>Plant 8</b> |
|-------------------------------------------------------------------------------------------------|----------------------------|----------------------------|----------------------------|----------------------------|----------------|----------------|----------------|----------------|
| 35S:SV40-AcrIIA4:Tnos (GB3344)                                                                  | +                          | +                          | +                          | +                          | -              | -              | -              | -              |
| SIDFR:Luc:Tnos-SF-35S:Renilla:Tnos-35S:P19:Tnos (GB1160)                                        | +                          | +                          | +                          | +                          | +              | +              | -              | -              |
| dCas9EDLL-Ms2:VPR SF -gRNA DFR -150 2.1 (GB2513)                                                | +                          | +                          | +                          | +                          | +              | -              | -              | -              |
| U6-26-4gRNA Pnos-F6x2_35s-dCas9:EDLL-Tnos-U6-26-5gRNA Pnos scf F6x2 - 35s-Ms2:VPR-Tnos (GB2049) | -                          | -                          | -                          | -                          | -              | +              | -              | -              |
| pSF (GB0107)                                                                                    | -                          | -                          | -                          | -                          | +              | +              | -              | -              |
| PNos:Luciferase:Tnos-SF-35S:Renilla:Tnos-35S:P19:Tnos-SF (GB1116)                               | -                          | -                          | -                          | -                          | -              | -              | +              | -              |

*Temperature Dependent Degron assay (Figure 2D)*

| <b>Construct</b>                                                                                | <b>14°C</b>    |                |                |                | <b>28°C</b>    |                |                |                |
|-------------------------------------------------------------------------------------------------|----------------|----------------|----------------|----------------|----------------|----------------|----------------|----------------|
|                                                                                                 | <b>Plant 1</b> | <b>Plant 2</b> | <b>Plant 3</b> | <b>Plant 4</b> | <b>Plant 5</b> | <b>Plant 6</b> | <b>Plant 7</b> | <b>Plant 8</b> |
| 35S:K2:SV40-AcrIIA4:Tnos (GB3670) OD0.05                                                        | +              | -              | -              | -              | +              | -              | -              | -              |
| 35S:K2:AcrIIA4:Tnos (GB3671) OD0.05                                                             | -              | +              | +              | -              | -              | +              | +              | -              |
| SIDFR:Luc:Tnos-SF-35S:Renilla:Tnos-35S:P19:Tnos (GB1160)                                        | +              | +              | +              | -              | +              | +              | +              | -              |
| dCas9EDLL-Ms2:VPR SF -gRNA DFR -150 2.1 (GB2513)                                                | +              | +              | -              | -              | +              | +              | -              | -              |
| U6-26-4gRNA Pnos-F6x2_35s-dCas9:EDLL-Tnos-U6-26-5gRNA Pnos scf F6x2 - 35s-Ms2:VPR-Tnos (GB2049) | -              | -              | +              | -              | -              | -              | +              | -              |
| pSF (GB0040)                                                                                    | +              | +              | +              | -              | +              | +              | +              | -              |
| PNos:Luciferase:Tnos-SF-35S:Renilla:Tnos-35S:P19:Tnos-SF (GB1116)                               | -              | -              | -              | +              | -              | -              | -              | +              |

### Auxin Inducible Degron assay (Figure 3B)

| Construct                                                                                       | 10μM IAA |         |         |         |         |         |         |         | 0μM IAA |          |          |          |          |          |          |          |          |
|-------------------------------------------------------------------------------------------------|----------|---------|---------|---------|---------|---------|---------|---------|---------|----------|----------|----------|----------|----------|----------|----------|----------|
|                                                                                                 | Plant 1  | Plant 2 | Plant 3 | Plant 4 | Plant 5 | Plant 6 | Plant 7 | Plant 8 | Plant 9 | Plant 10 | Plant 11 | Plant 12 | Plant 13 | Plant 14 | Plant 15 | Plant 16 | Plant 17 |
| 35S:SV40-AcrIIA4:Tnos (GB3344) OD0.05                                                           | -        | -       | -       | -       | +       | -       | -       | -       | -       | -        | -        | -        | +        | -        | -        | -        | -        |
| 35S:mAID:SV40-AcrIIA4:Tnos (GB3666) OD0.05                                                      | +        | -       |         | -       |         | -       | -       | -       | +       | -        |          | -        |          | -        | -        | -        | -        |
| 35S:SV40-AcrIIA4:mAID:Tnos (GB3667) OD0.05                                                      | -        | +       | -       | -       | -       | -       | -       | -       | -       | +        | -        | -        | -        | -        | -        | -        | -        |
| 35S:mAID:AcrIIA4:Tnos (GB3668) OD0.05                                                           | -        | -       | +       | -       | -       | -       |         | -       | -       | -        | +        | -        | -        | -        | -        | -        | -        |
| 35S:AcrIIA4:mAID:Tnos (GB3669) OD0.05                                                           | -        | -       | -       | +       | -       | -       | -       | -       | -       | -        | -        | +        | -        | -        | -        | -        | -        |
| SIDFR:Luc:TNos-SF-35S:Renilla:TNos-35S:P19:Tnos (GB1160)                                        | +        | +       | +       | +       | +       | +       | +       | -       | +       | +        | +        | +        | +        | +        | +        | -        | -        |
| dCas9EDLL-Ms2:VPR SF -gRNA DFR -150 2.1 (GB2513)                                                | +        | +       | +       | +       | +       | +       | -       | -       | +       | +        | +        | +        | +        | +        | -        | -        | -        |
| U6-26-4gRNA Pnos-F6x2_35s-dCas9:EDLL-Tnos-U6-26-5gRNA Pnos scf F6x2 - 35s-Ms2:VPR-Tnos (GB2049) | -        | -       | -       | -       | -       | -       | +       | -       | -       | -        | -        | -        | -        | -        | +        | -        | -        |
| pSF (GB0107)                                                                                    | -        | +       | -       | -       | -       | +       | +       | -       | -       | +        | -        | -        | -        | +        | +        | -        | -        |
| PNos:Luciferase:TNos-SF-35S:Renilla:TNos-35S:P19:TNos-SF (GB1116)                               | -        | -       | -       | -       | -       | -       | -       | +       | -       | -        | -        | -        | -        | -        | -        | +        | -        |

### Auxin Inducible Degron dose-response assay (Figure 3C)

| Construct                                                                                       | Plant 1 (5 $\mu$ M) | Plant 2 (1 $\mu$ M) | Plant 3 (0.5 $\mu$ M) | Plant 4 (0.1 $\mu$ M) | Plant 5 | Plant 6 | Plant 7 | Plant 8 |
|-------------------------------------------------------------------------------------------------|---------------------|---------------------|-----------------------|-----------------------|---------|---------|---------|---------|
| 35S:mAID:AcrIIA4:Tnos (GB3668) OD0.05                                                           | +                   | +                   | +                     | +                     | -       | -       | -       | -       |
| SIDFR:Luc:Tnos-SF-35S:Renilla:Tnos-35S:P19:Tnos (GB1160)                                        | +                   | +                   | +                     | +                     | +       | +       | -       | -       |
| dCas9EDLL-Ms2:VPR SF -gRNA DFR -150 2.1 (GB2513)                                                | +                   | +                   | +                     | +                     | +       | -       | -       | -       |
| U6-26-4gRNA Pnos-F6x2_35s-dCas9:EDLL-Tnos-U6-26-5gRNA Pnos scf F6x2 - 35s-Ms2:VPR-Tnos (GB2049) | -                   | -                   | -                     | -                     | -       | +       | -       | -       |
| pSF (GB0107)                                                                                    | +                   | +                   | +                     | +                     | +       | +       | -       | -       |
| PNos:Luciferase:Tnos-SF-35S:Renilla:Tnos-35S:P19:Tnos-SF (GB1116)                               | -                   | -                   | -                     | -                     | -       | -       | +       | -       |

*Auxin Inducible Degron time-course assay (Figure 3D)*

| <b>Construct</b>                                                                                                  | <b>Plant 1<br/>(0h)</b> | <b>Plant 2<br/>(24h)</b> | <b>Plant 3<br/>(48h)</b> | <b>Plant 4<br/>(72h)</b> | <b>Plant 5<br/>(24-72h)</b> | <b>Plant 6</b> | <b>Plant 7</b> | <b>Plant 8</b> | <b>Plant 9</b> |
|-------------------------------------------------------------------------------------------------------------------|-------------------------|--------------------------|--------------------------|--------------------------|-----------------------------|----------------|----------------|----------------|----------------|
| 35S:mAID:AcrlIA4:Tnos<br>(GB3668) OD0.05                                                                          | +                       | +                        | +                        | +                        | +                           | -              | -              | -              | -              |
| SIDFR:Luc:Tnos-SF-<br>35S:Renilla:Tnos-<br>35S:P19:Tnos (GB1160)                                                  | +                       | +                        | +                        | +                        | +                           | +              | +              | -              | -              |
| dCas9EDLL-Ms2:VPR<br>SF -gRNA DFR -150 2.1<br>(GB2513)                                                            | +                       | +                        | +                        | +                        | +                           | +              | -              | -              | -              |
| U6-26-4gRNA Pnos-<br>F6x2_35s-dCas9:EDLL-<br>Tnos-U6-26-5gRNA<br>Pnos scf F6x2 - 35s-<br>Ms2:VPR-Tnos<br>(GB2049) | -                       | -                        | -                        | -                        | -                           | -              | +              | -              | -              |
| pSF (GB0107)                                                                                                      | +                       | +                        | +                        | +                        | +                           | +              | +              | -              | -              |
| PNos:Luciferase:Tnos-<br>SF-35S:Renilla:Tnos-<br>35S:P19:Tnos-SF<br>(GB1116)                                      | -                       | -                        | -                        | -                        | -                           | -              | -              | +              | -              |

*Endogenous genes activation assay (Figure 4)*

| <b>Construct</b>                                           | <b>Plant 1</b> | <b>Plant 2</b> | <b>Plant 3</b> | <b>Plant 4</b> |
|------------------------------------------------------------|----------------|----------------|----------------|----------------|
| 35S:SV40-AcrIIA4:Tnos (GB3344)                             | +              | -              | +              | -              |
| 35s-Ms2:VPR-Tnos-35s-<br>dCas9:EDLL-Tnos (GB2085)          | +              | +              | +              | +              |
| U6-26-sgRNANbDFR -85,-198,-<br>268 F6x2 Multiplex (GB2170) | +              | +              | -              | -              |
| U6-26-sgRNANbAN2 -103,-175,-<br>196 F6x2 (GB2171)          | -              | -              | +              | +              |
| pSF (GB0040)                                               | -              | +              | -              | +              |
| 35s:P19:Tnos (GB0108)                                      | +              | +              | +              | +              |
